# Supplementary material for: Boosting charge and thermal transport – role of insulators in stable and efficient n-type polymer transistors
Source: Royal Society of Chemistry journal article supplement (doi:10.1039/d1tc02346b), 2021-01-01
Supplement: d1tc02346b1.pdf [file d1tc02346b1.pdf]

## Supporting Information

### Boosting Charge and Thermal Transport – Role of Insulators for Stable and Efficient N-type Polymer Transistors

Zhuoqiong Zhang, Johnny Ka Wai Ho, Chujun Zhang, Hang Yin, Zhenchuan Wen, Guilong Cai, Ruyan Zhao, Run Shi, Xinhui Lu, Jun Liu, Xiaotao Hao, Chun Cheng\*, Shu Kong So\*

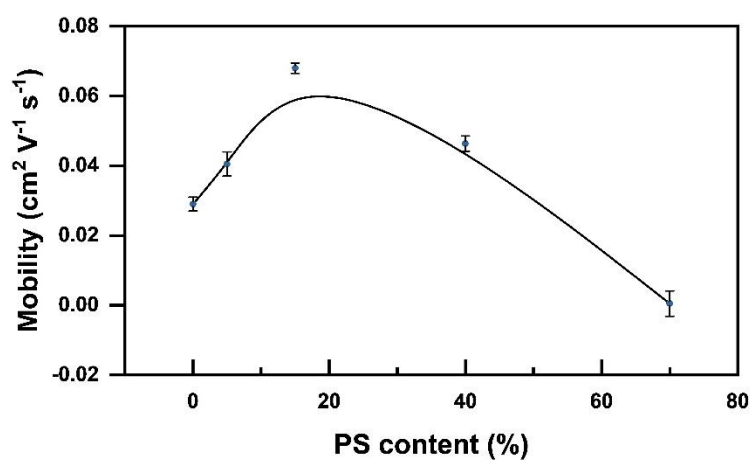

**Figure R1.** The average mobility of N2200 extracted in the saturation regime as a function of PS content.

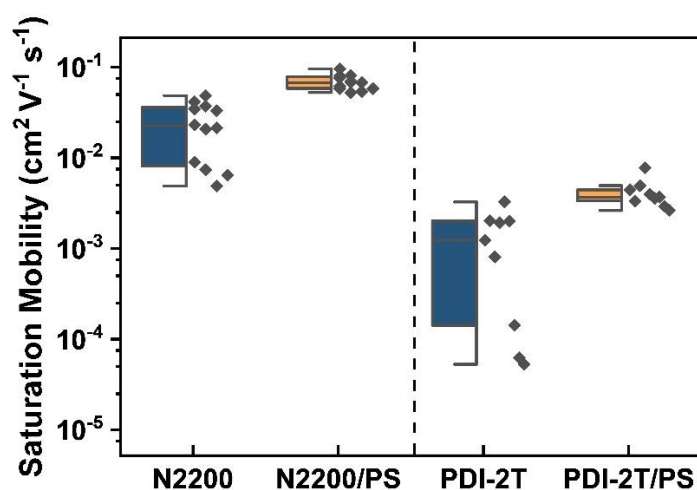

**Figure S2.** Distribution of average saturation mobility of measured top-gate bottom-contact devices based on neat and blended films of PDI-2T and N2200.

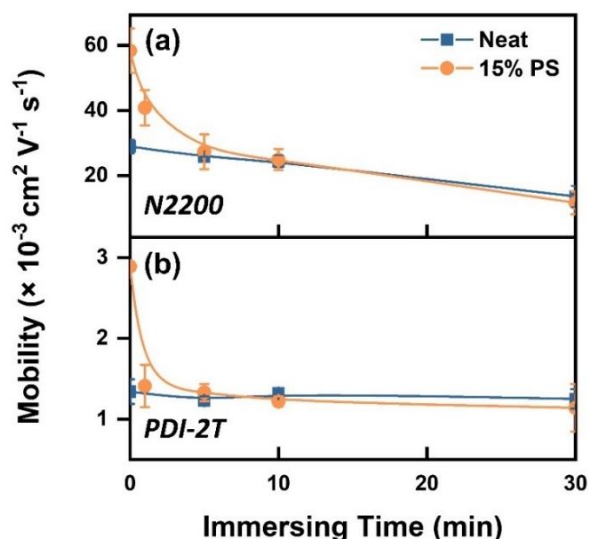

**Figure S3.** Bottom-gate top-contact OFET mobilities for neat semiconductor and blends based on (a) N2200 and (b) PDI-2T as a function of immersing time in 2-propanol.

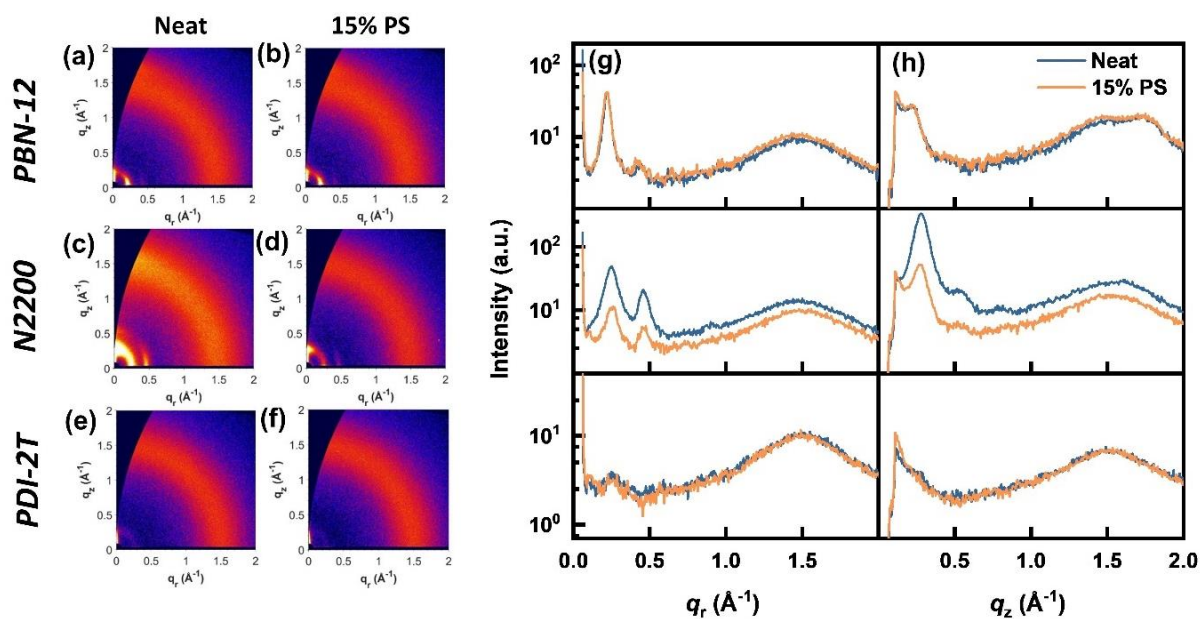

**Figure S4.** GIWAXS profiles of PBN-12, N2200, PDI-2T without (a, c, e) and with (b, d, f) PS incorporation. (g–h) show the corresponding signal intensity along  $q_r$  and  $q_z$  axes.

**Chemical List:**

**N2200:** Poly{[*N,N'*-bis(2-octyldodecyl)naphthalene-1,4,5,8-bis(dicarboximide)-2,6-diyl]-alt-5,5'-(2,2'-bithiophene)}

**PDI-2T:** Poly[[1,2,3,8,9,10-hexahydro-2,9-bis(1-nonyldecyl)-1,3,8,10-tetraoxanthra[2,1,9-def:6,5,10-d'e'f]diisoquinoline-5,12-diyl][2,2'-bithiophene]-5,5'-diyl]

**P(S-r-BCB-r-MMA):** Poly(styrene-co-methyl methacrylate-co-vinyl benzocyclobutene)

**PPFS:** Poly(2,3,4,5,6-pentafluorostyrene)

**PDINO:** *N,N*-dioxide of bis(*N,N'*-dimethylaminopropyl)perylene diimide
